# Supplementary material for: Inhibition of the formation of lysozyme fibrillar assemblies by the isoquinoline alkaloid coralyne
Source: Royal Society of Chemistry journal article supplement (doi:10.1039/d1nj06007d), 2022-01-01
Supplement: d1nj06007d1.pdf [file d1nj06007d1.pdf]

## Supplementary Information

### Inhibition of the formation of lysozyme fibrillar assemblies by the isoquinoline alkaloid coralyne

Anirban Basu\* Adil Mahammad and Arindam Das

*Department of Chemistry, Vidyasagar University, Midnapore 721 102, India*

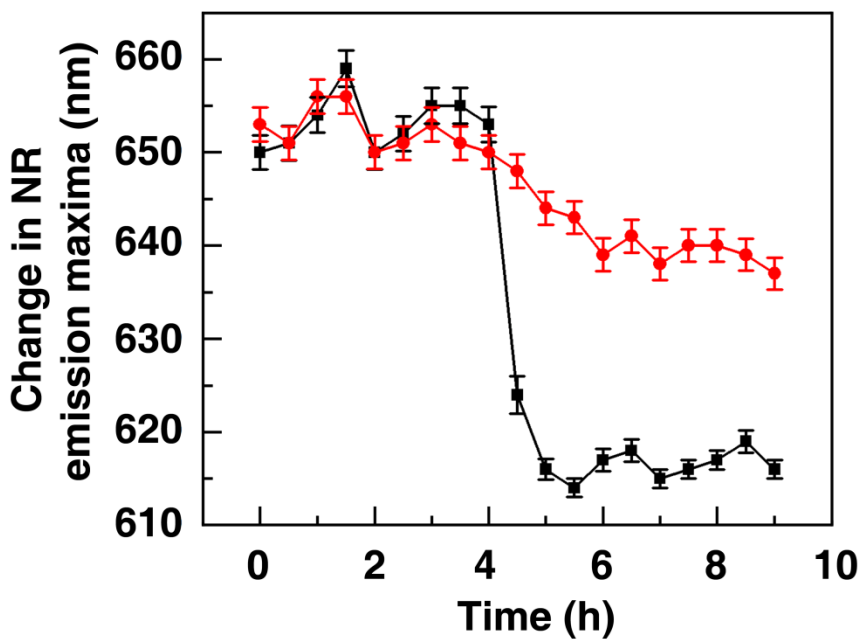

**Fig. S1.** Variation of the emission maxima of NR with time for HEWL samples in the absence (■) and presence (●) of COR.

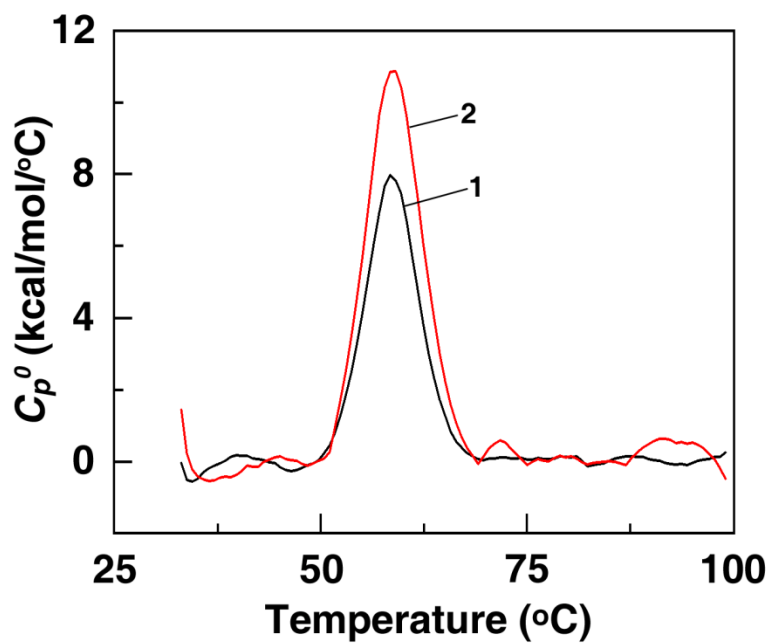

**Fig. S2.** DSC thermograms of HEWL (curve 1) and HEWL-COR complex (curve 2) at  $D/P$  (COR : HEWL molar ratio) = 10.
